# Supplementary material for: Optimised spectral pre-processing for discrimination of biofluids via ATR-FTIR spectroscopy
Source: Royal Society of Chemistry journal article supplement (doi:10.1039/c8an01384e), 2018-01-01
Supplement: c8an01384e1.pdf [file c8an01384e1.pdf]

## Supplementary Information

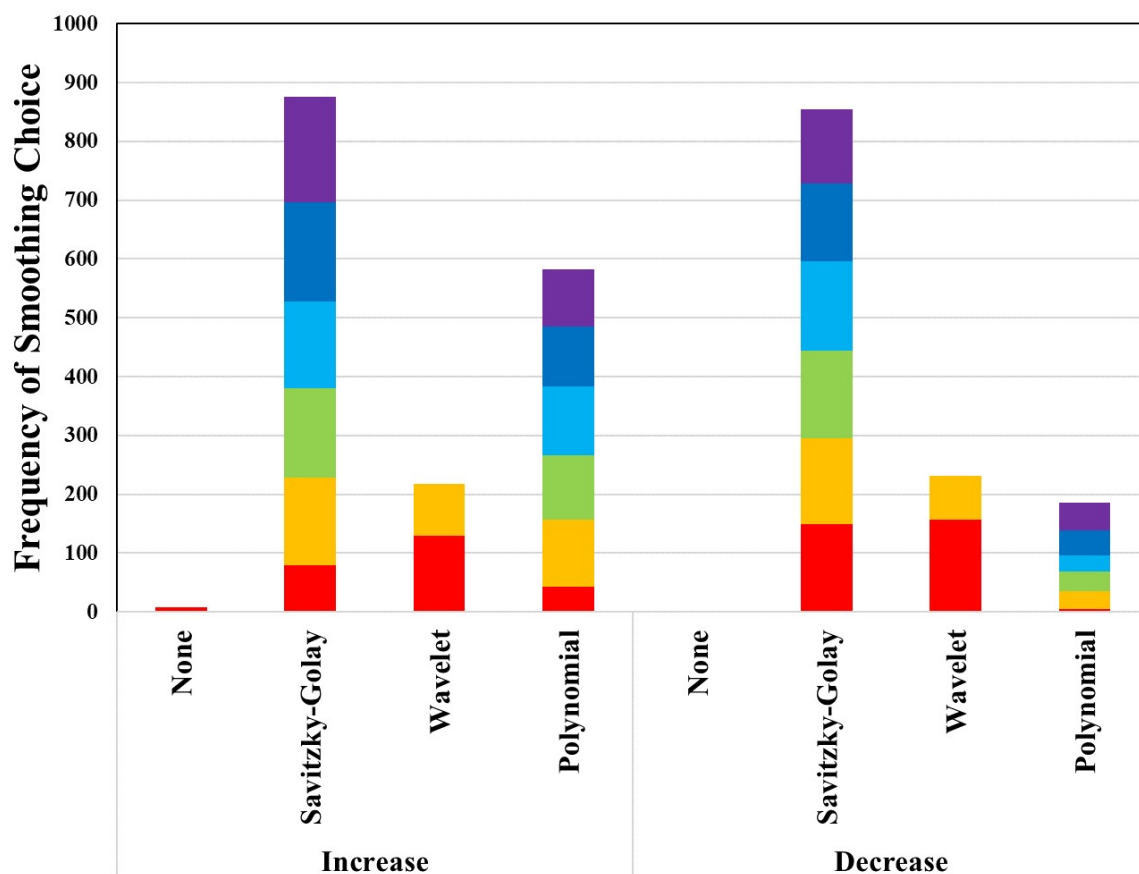

**Figure S1:** Exploring the impact of smoothing on classification performance using the overall metric. The frequency of each smoothing permutation is shown with regards to an **increase** in performance compared to the raw unprocessed data, and also the **decrease** in performance. If a smoothing procedure has user defined parameters, these are described within the individual bar charts (1 → 6 from red → purple).

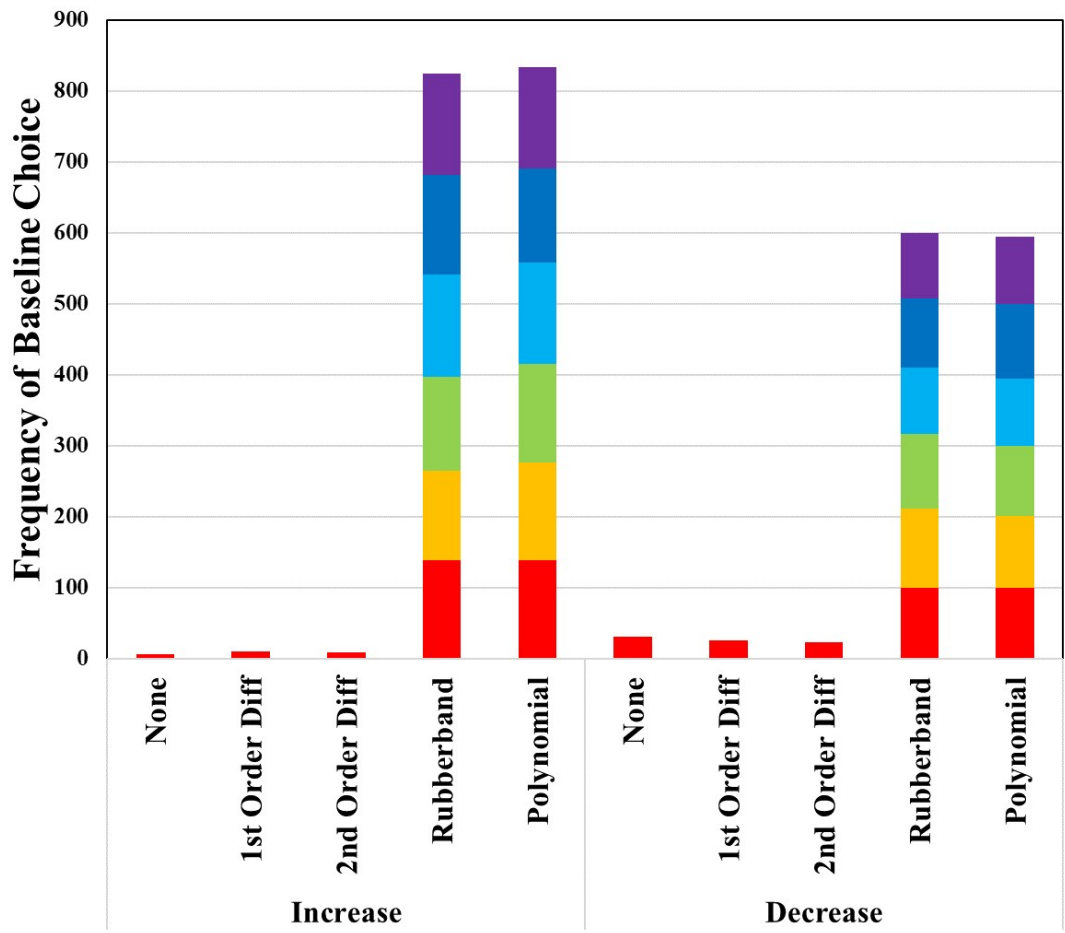

**Figure S2:** Exploring the impact of baseline correction on classification performance using the overall metric. The frequency of each smoothing permutation is shown with regards to an **increase** in performance compared to the raw unprocessed data, and also the **decrease** in performance. If a smoothing procedure has user defined parameters, these are described within the individual bar charts (1 → 6 from red → purple).

**Table S1:** Diagnostic performance metrics for the top twelve pre-processing permutations applied in alternative orders in the full separate re-analysis of the data. The values from the original BSNC ordering differ from those previously reported, due to the separate analysis of the data. Each order combination is denoted by (B) binning, (S) smoothing, (N) normalisation and (C) baseline correction. Shaded colouring is ranked separately for each metric, highlighting the highest and lowest values with green colour representing the highest value and red representing the lowest value.

| Permutation | BSNC    |       |       | BCSN    |       |       | BCNS    |       |       | BSCN    |       |       | BNCS    |       |       | BNSC    |       |       |
|-------------|---------|-------|-------|---------|-------|-------|---------|-------|-------|---------|-------|-------|---------|-------|-------|---------|-------|-------|
|             | Overall | Sens  | Spec  |
| 100220      | 5.319   | 0.930 | 0.892 | 5.304   | 0.929 | 0.890 | 5.284   | 0.928 | 0.885 | 5.283   | 0.927 | 0.886 | 5.293   | 0.928 | 0.889 | 5.304   | 0.927 | 0.896 |
| 100020      | 5.262   | 0.925 | 0.884 | 5.262   | 0.925 | 0.884 | 5.262   | 0.925 | 0.884 | 5.262   | 0.925 | 0.884 | 5.262   | 0.925 | 0.884 | 5.262   | 0.925 | 0.884 |
| 416220      | 5.215   | 0.923 | 0.868 | 5.227   | 0.924 | 0.872 | 5.260   | 0.927 | 0.878 | 5.213   | 0.922 | 0.869 | 5.167   | 0.918 | 0.860 | 5.118   | 0.913 | 0.854 |
| 416320      | 5.192   | 0.923 | 0.857 | 5.056   | 0.911 | 0.832 | 5.236   | 0.925 | 0.873 | 5.165   | 0.915 | 0.871 | 5.092   | 0.929 | 0.806 | 5.090   | 0.938 | 0.787 |
| 100210      | 5.172   | 0.924 | 0.847 | 5.241   | 0.921 | 0.885 | 5.221   | 0.920 | 0.879 | 5.218   | 0.916 | 0.890 | 5.249   | 0.923 | 0.883 | 5.266   | 0.923 | 0.891 |
| 416210      | 5.122   | 0.924 | 0.824 | 5.136   | 0.917 | 0.849 | 5.212   | 0.923 | 0.868 | 5.137   | 0.915 | 0.857 | 5.104   | 0.919 | 0.832 | 5.083   | 0.917 | 0.828 |
| 416310      | 5.101   | 0.918 | 0.830 | 5.125   | 0.917 | 0.847 | 5.132   | 0.917 | 0.848 | 5.164   | 0.918 | 0.861 | 5.021   | 0.936 | 0.763 | 5.047   | 0.932 | 0.779 |
| 100010      | 5.084   | 0.918 | 0.825 | 5.084   | 0.918 | 0.825 | 5.084   | 0.918 | 0.825 | 5.084   | 0.918 | 0.825 | 5.084   | 0.918 | 0.825 | 5.084   | 0.918 | 0.825 |
| 424010      | 5.044   | 0.914 | 0.817 | 5.038   | 0.915 | 0.815 | 4.946   | 0.906 | 0.799 | 5.066   | 0.912 | 0.831 | 5.029   | 0.913 | 0.813 | 5.071   | 0.914 | 0.831 |
| 412136      | 5.038   | 0.917 | 0.807 | 4.950   | 0.915 | 0.777 | 4.919   | 0.915 | 0.765 | 4.956   | 0.912 | 0.787 | 5.032   | 0.920 | 0.798 | 5.051   | 0.923 | 0.797 |
| 424210      | 5.023   | 0.913 | 0.811 | 4.981   | 0.906 | 0.814 | 5.025   | 0.908 | 0.826 | 5.104   | 0.914 | 0.844 | 5.032   | 0.911 | 0.821 | 5.113   | 0.917 | 0.839 |
| 412132      | 5.009   | 0.913 | 0.805 | 5.021   | 0.921 | 0.792 | 5.051   | 0.921 | 0.802 | 5.081   | 0.924 | 0.807 | 5.069   | 0.922 | 0.807 | 5.056   | 0.922 | 0.803 |

**Table S2:** Percentage change in diagnostic performance metrics for the top twelve pre-processing permutations applied in alternative orders in the full separate re-analysis of the data. Here you can see that Each order combination is denoted by (B) binning, (S) smoothing, (N) normalisation and (C) baseline correction. Shaded colouring is ranked separately for each metric, highlighting the highest and lowest values.

| Permutation   | BCSN    |        |        | BCNS    |        |        | BSCN    |        |        | BNCS    |        |        | BNSC    |        |        |
|---------------|---------|--------|--------|---------|--------|--------|---------|--------|--------|---------|--------|--------|---------|--------|--------|
|               | Overall | Sens   | Spec   |
| <b>100220</b> | -0.281  | -0.153 | -0.210 | -0.666  | -0.300 | -0.778 | -0.684  | -0.344 | -0.751 | -0.487  | -0.290 | -0.418 | -0.290  | -0.396 | 0.439  |
| <b>100020</b> | 0.000   | 0.000  | 0.000  | 0.000   | 0.000  | 0.000  | 0.000   | 0.000  | 0.000  | 0.000   | 0.000  | 0.000  | 0.000   | 0.000  | 0.000  |
| <b>416220</b> | 0.233   | 0.117  | 0.505  | 0.870   | 0.397  | 1.258  | -0.042  | -0.042 | 0.208  | -0.925  | -0.474 | -0.857 | -1.852  | -1.076 | -1.581 |
| <b>416320</b> | -2.606  | -1.297 | -2.940 | 0.858   | 0.194  | 1.867  | -0.515  | -0.919 | 1.610  | -1.917  | 0.663  | -5.968 | -1.957  | 1.583  | -8.201 |
| <b>100210</b> | 1.327   | -0.276 | 4.437  | 0.934   | -0.415 | 3.817  | 0.876   | -0.837 | 5.010  | 1.481   | -0.096 | 4.285  | 1.811   | -0.113 | 5.237  |
| <b>416210</b> | 0.271   | -0.745 | 3.022  | 1.763   | -0.183 | 5.311  | 0.296   | -1.037 | 3.971  | -0.344  | -0.612 | 0.933  | -0.758  | -0.795 | 0.426  |
| <b>416310</b> | 0.469   | -0.212 | 2.036  | 0.616   | -0.124 | 2.149  | 1.243   | -0.100 | 3.717  | -1.562  | 1.953  | -8.060 | -1.054  | 1.510  | -6.094 |
| <b>100010</b> | 0.000   | 0.000  | 0.000  | 0.000   | 0.000  | 0.000  | 0.000   | 0.000  | 0.000  | 0.000   | 0.000  | 0.000  | 0.000   | 0.000  | 0.000  |
| <b>424010</b> | -0.113  | 0.047  | -0.283 | -1.940  | -0.930 | -2.238 | 0.428   | -0.182 | 1.760  | -0.299  | -0.106 | -0.450 | 0.542   | -0.046 | 1.688  |
| <b>412136</b> | -1.740  | -0.284 | -3.698 | -2.360  | -0.290 | -5.214 | -1.633  | -0.611 | -2.491 | -0.116  | 0.285  | -1.111 | 0.256   | 0.658  | -1.175 |
| <b>424210</b> | -0.848  | -0.777 | 0.289  | 0.040   | -0.523 | 1.843  | 1.613   | 0.168  | 3.958  | 0.167   | -0.218 | 1.211  | 1.785   | 0.485  | 3.447  |
| <b>412132</b> | 0.250   | 0.826  | -1.617 | 0.852   | 0.905  | -0.352 | 1.443   | 1.199  | 0.338  | 1.204   | 1.004  | 0.322  | 0.949   | 0.968  | -0.208 |

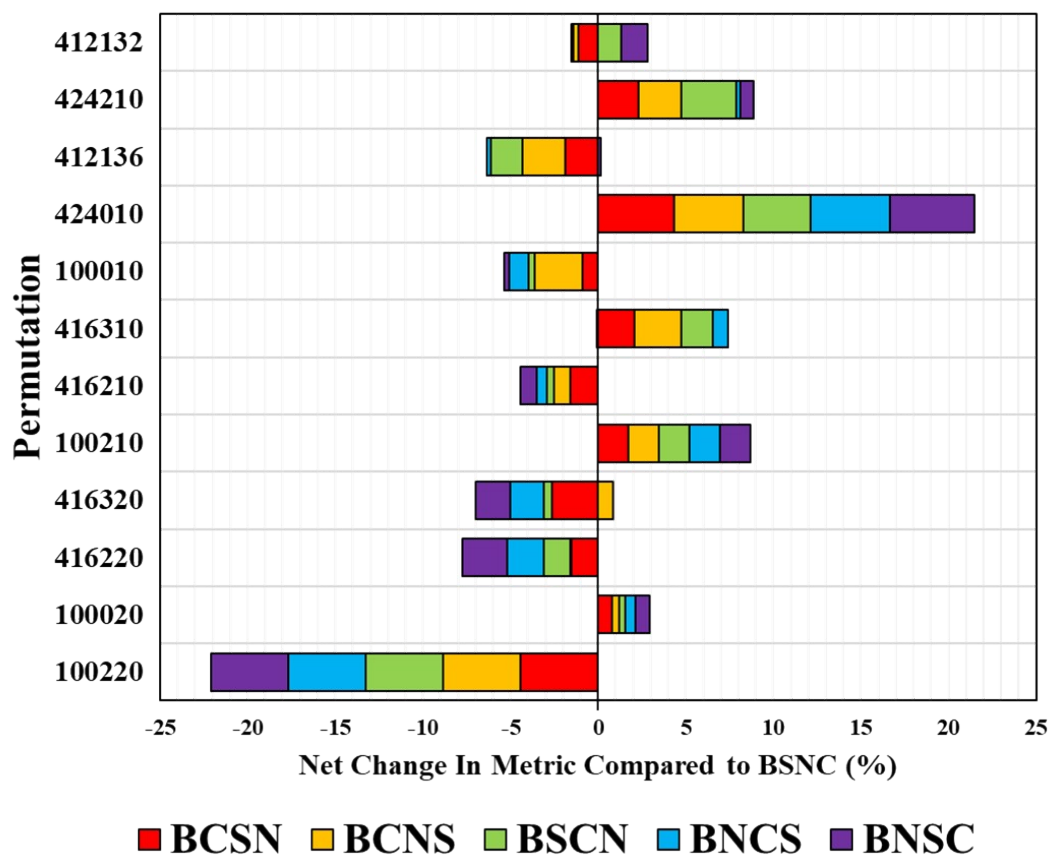

**Figure S3:** Percentage change in diagnostic performance metrics for the top twelve pre-processing permutations, comparing the previously reported metrics from the overall performance analysis and the newly generate re-order study. By comparing the two separate datasets, alterations in performance based on re-training the algorithm can be seen. Here you can see that Each order combination is denoted by (B) binning, (S) smoothing, (N) normalisation and (C) baseline correction. Shaded colouring is ranked separately for each metric, highlighting the highest and lowest values.

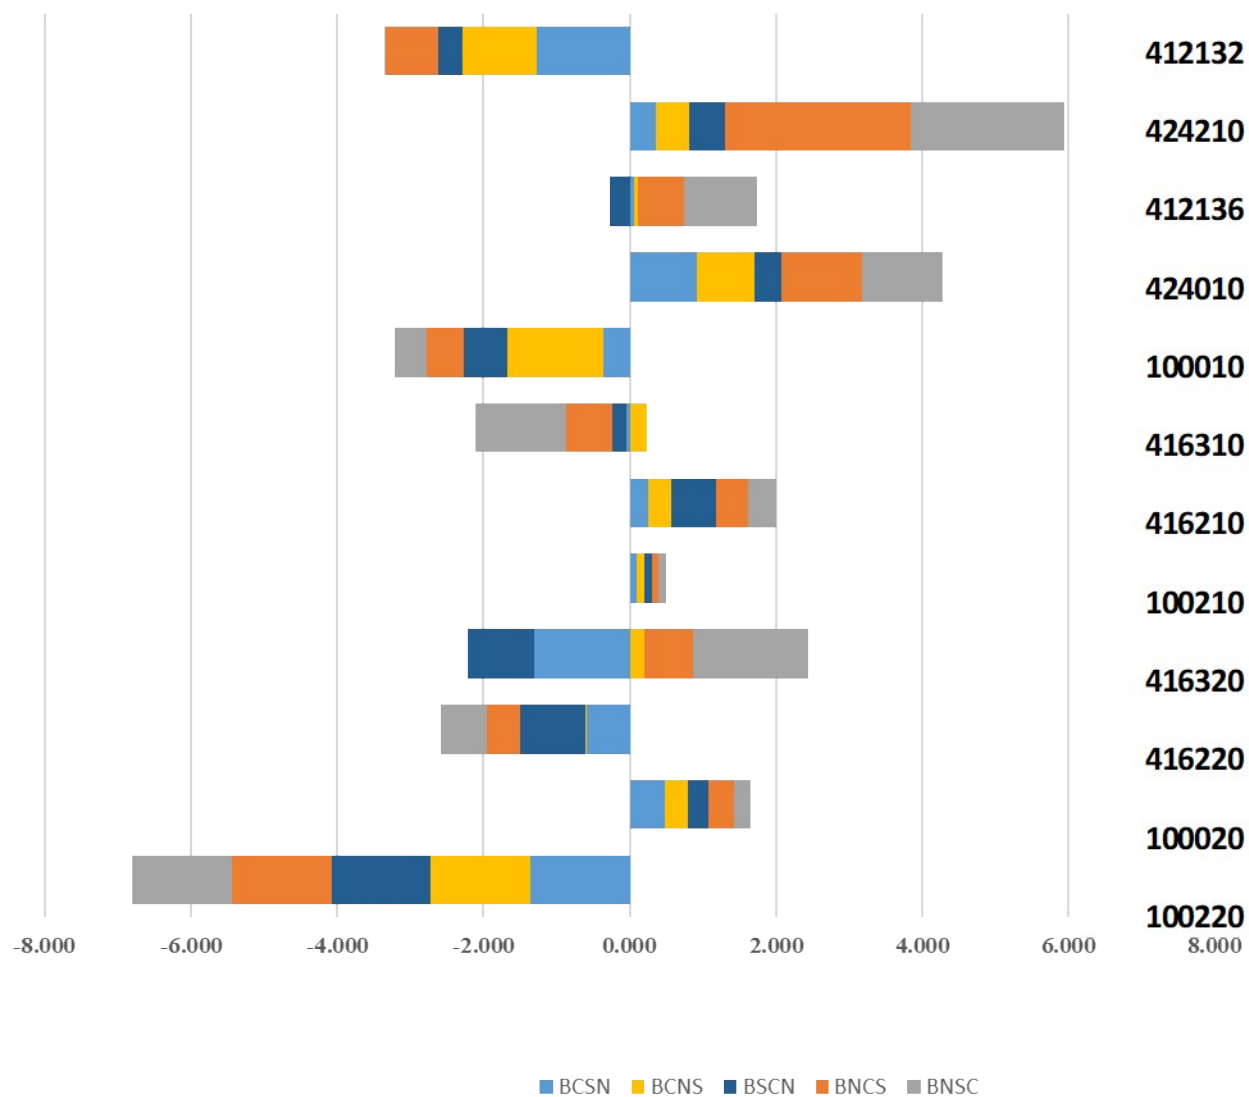

**Figure S4.** The comparative change (%) in sensitivity by altering the order of the top twelve pre-processing permutations. Each order combination is compared to the previously stated Binning (B), Smoothing (S), Normalisation (N) and Baseline Correction (C) order.

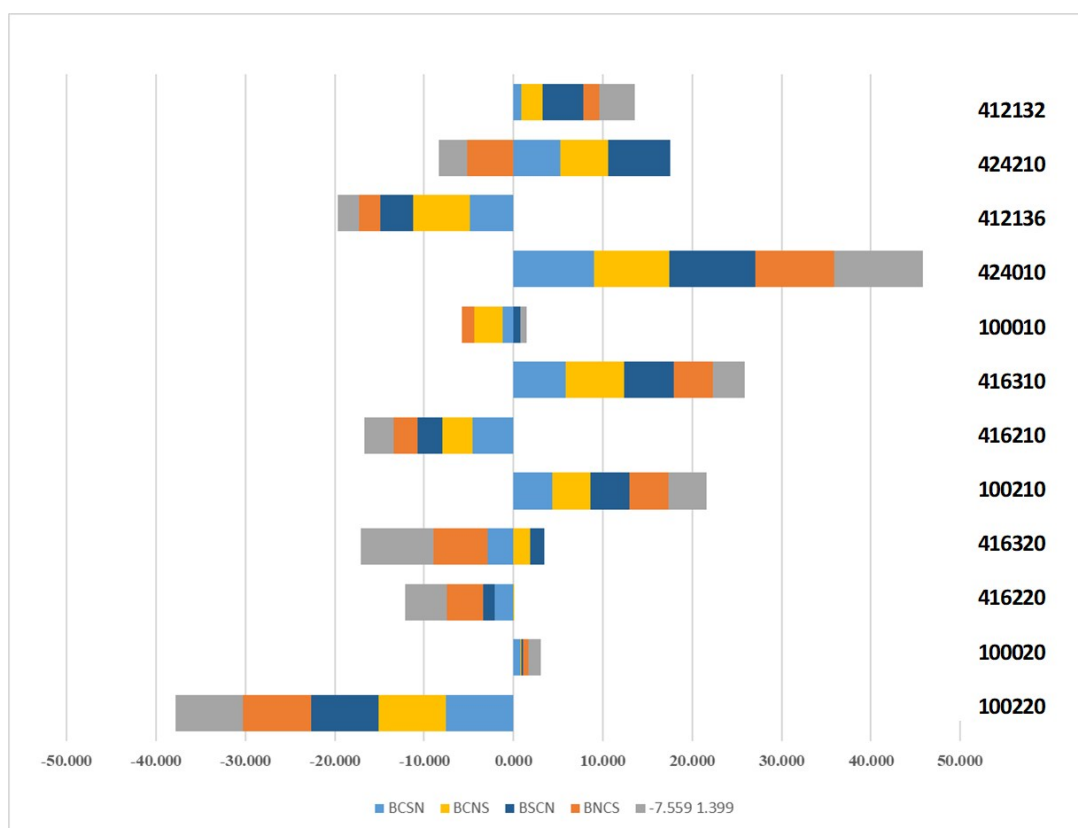

**Figure S5.** The comparative change (%) in specificity by altering the order of the top twelve pre-processing permutations. Each order combination is compared to the previously stated Binning (B), Smoothing (S), Normalisation (N) and Baseline Correction (C) order.

**Table S3.** The comparative change (%) in diagnostic performance compared to a standard random forest (RF) binary classifier by altering the order of the top twelve pre-processing permutations. (SVM – Support vector machine)

| Permutation   | Random Forest Fed SVM |      |      | Genetic Algorithm Fed SVM |      |       |
|---------------|-----------------------|------|------|---------------------------|------|-------|
|               | Overall               | Sens | Spec | Overall                   | Sens | Spec  |
| <b>100220</b> | -0.1                  | 0.6  | -2.6 | -0.4                      | 0.4  | -2.7  |
| <b>100020</b> | 0.5                   | 1.4  | -3.2 | 0.8                       | 0.4  | -0.3  |
| <b>416220</b> | 1.1                   | 0.7  | 0.0  | 0.0                       | 2.5  | -6.9  |
| <b>416320</b> | 0.5                   | 1.5  | -3.2 | -3.5                      | -0.5 | -8.2  |
| <b>100210</b> | 0.7                   | 2.6  | -5.2 | -0.5                      | 1.2  | -4.9  |
| <b>416310</b> | 0.9                   | 3.2  | -6.5 | -0.6                      | 2.9  | -9.2  |
| <b>416210</b> | 3.1                   | 0.3  | 6.1  | -4.0                      | 0.6  | -11.8 |
| <b>100010</b> | 2.8                   | 2.0  | 1.3  | 4.1                       | 2.7  | 2.8   |
| <b>424210</b> | 1.2                   | 2.7  | -4.4 | -5.0                      | -0.7 | -11.0 |
| <b>424010</b> | 0.5                   | 1.4  | -2.8 | -1.6                      | 1.2  | -7.5  |
| <b>412132</b> | 6.2                   | 2.6  | 8.1  | 7.4                       | 4.0  | 7.4   |
| <b>412136</b> | 2.4                   | 0.7  | 3.5  | 7.2                       | 3.6  | 8.1   |
